# Supplementary material
Source: publisher figshare collection journal article supplement (https://gsapubs.figshare.com/ndownloader/files/23293793)
Supplement: Supplementary file 1 [file 23293793]

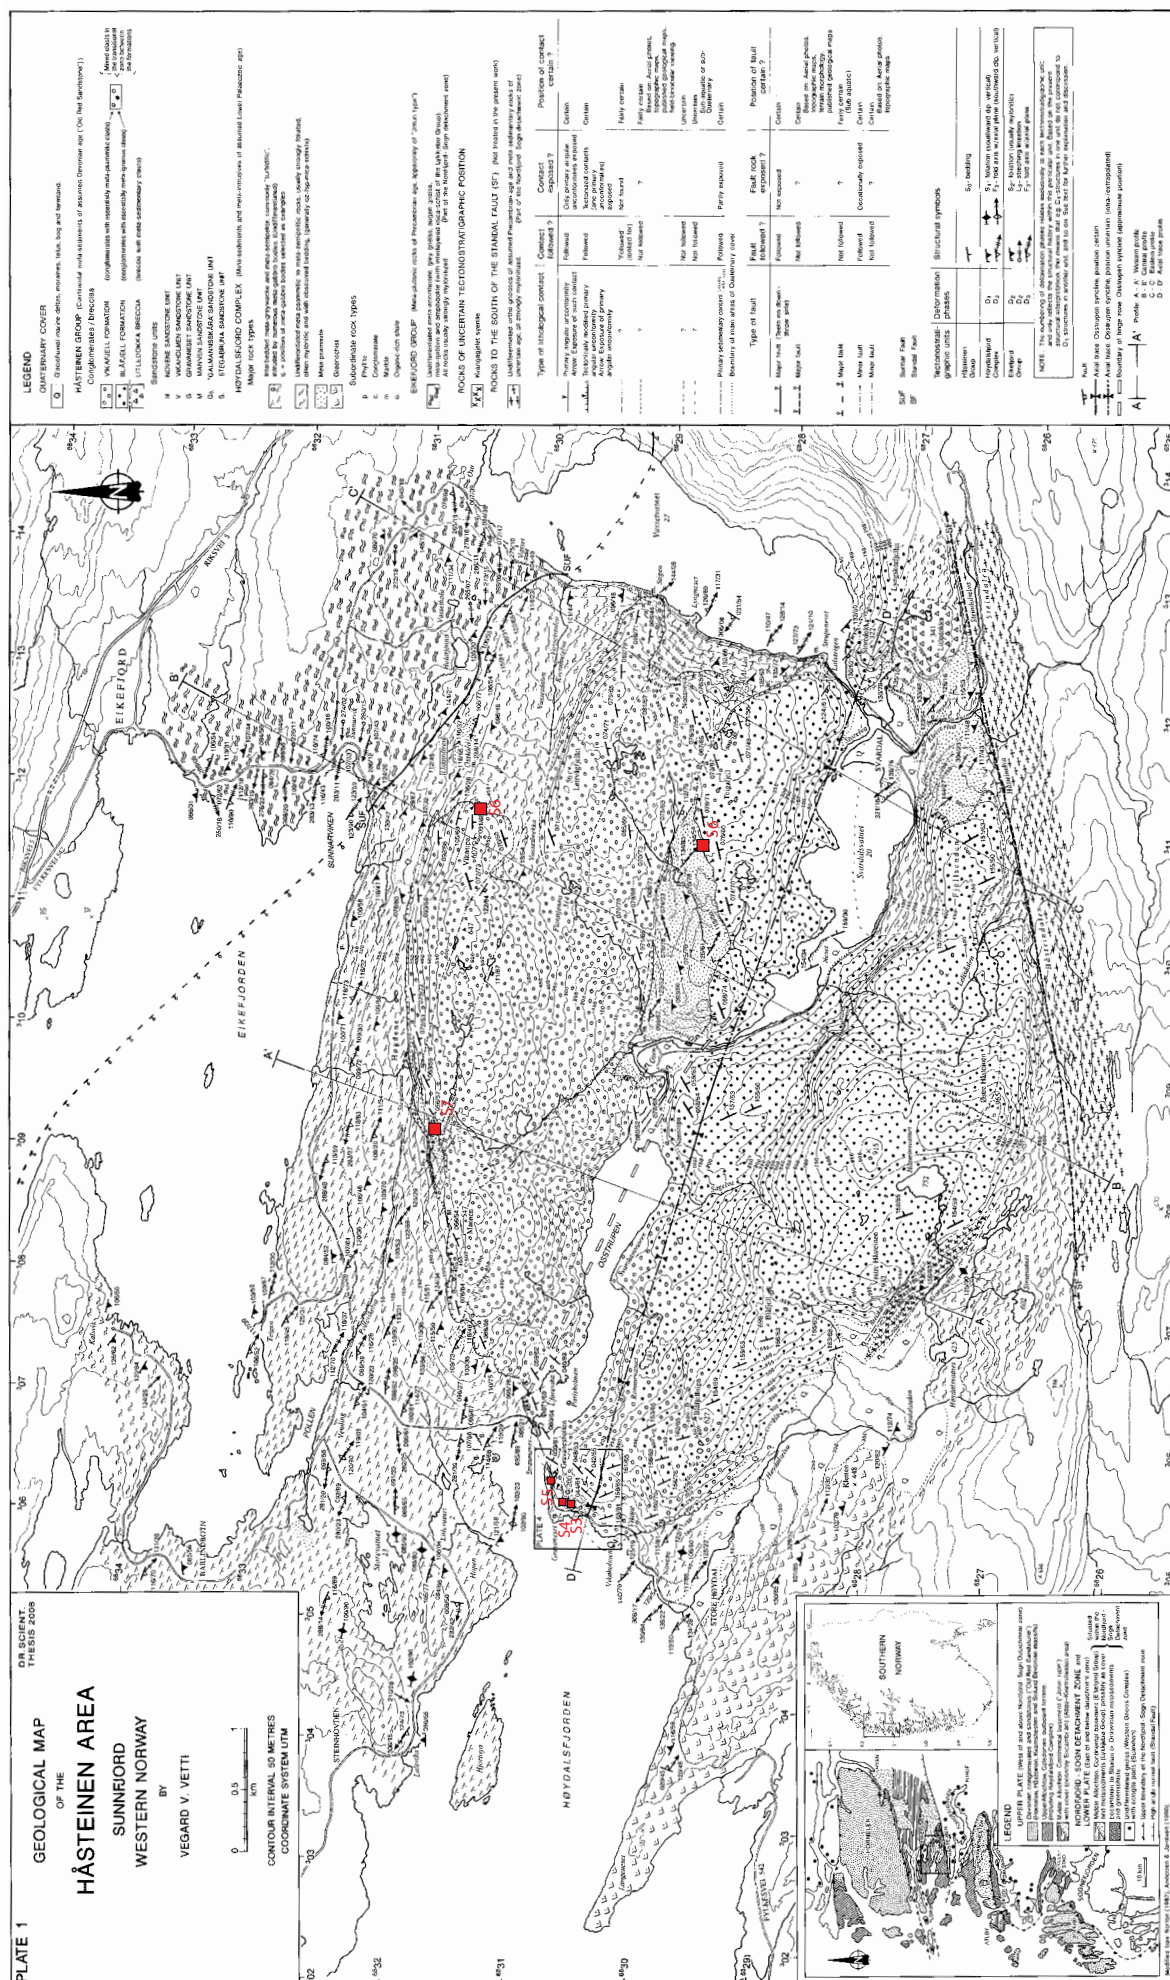

**Figure S1.** Geologic map of the Håsteinen basin. Locations of photos of the unconformity are indicated. From Vetti (2008).

PROFILES

HÅSTEINEN AREA

SUNNFJORD  
WESTERN NORWAY

BY

VEGARD V. VETTI

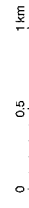

HORIZONTAL SCALE = VERTICAL SCALE (metres)

LEGEND

HÅSTEINEN GROUP (Confidential meta-sediments of assumed Devonian age ("Old Red Sandstone"))

Conglomerates

VIKÅSEL FORMATION (Conglomerates with meta-psammite clasts)

BLÅFJELL FORMATION (Conglomerates with meta-gneiss clasts)

SANDSTONE UNITS

Gs. "GALMANSKAR" SANDSTONE UNIT

S. STEIGRANA SANDSTONE UNIT

HOYDALSFJORD COMPLEX (Meta-sediments and meta-intrusives of assumed Lower Palaeozoic age)

Major rock types

Undifferentiated meta-igneous and meta-sedimentary, commonly "funder".

Undifferentiated meta-psammite to meta-siltstone, usually strongly foliated.



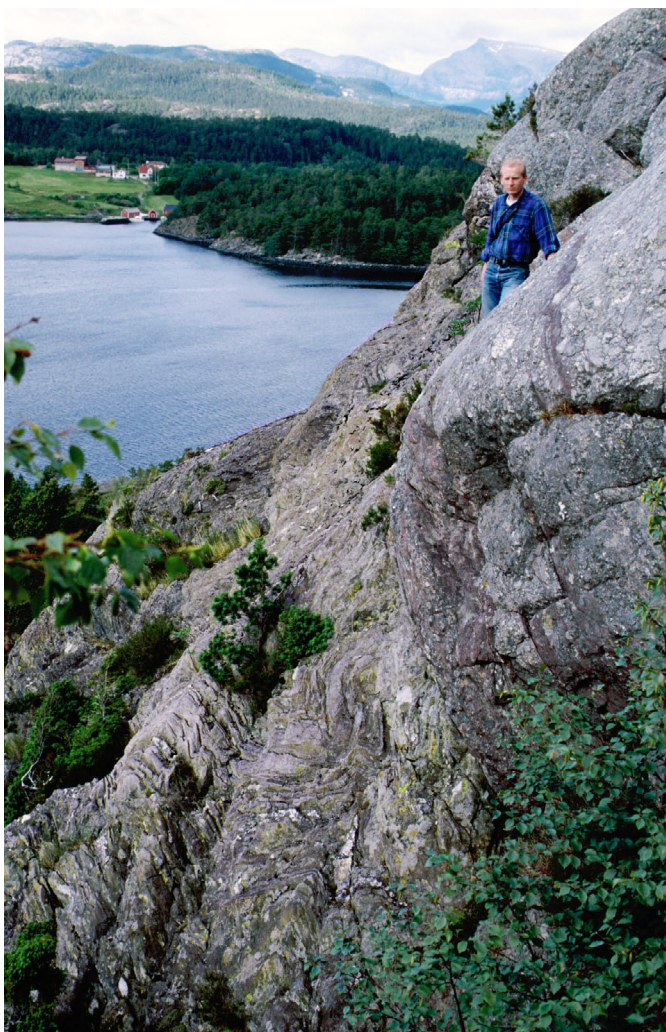

**Figure S3.** Unconformity between the Høydalsfjord Complex and Devonian conglomerates near Osstrupen (see Fig. S1 for location). The mountain in the far distance is made up of sandstones of the Hornelen basin. The lower part of this figure forms the basis for the sketch shown in Fig. 3 in the paper.

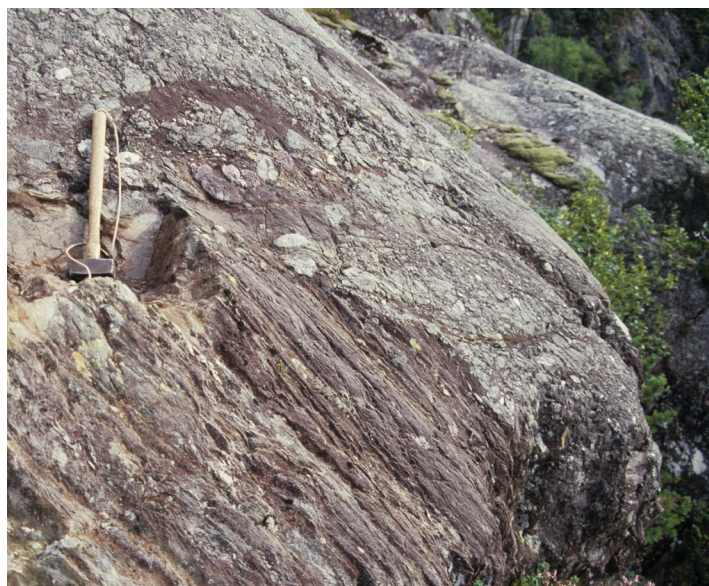

**Figure S4.** The unconformity near Osstrupen (see Fig. S1 for location). Schists of the substrate showing a strong foliation that predate the overlying conglomerate beds.

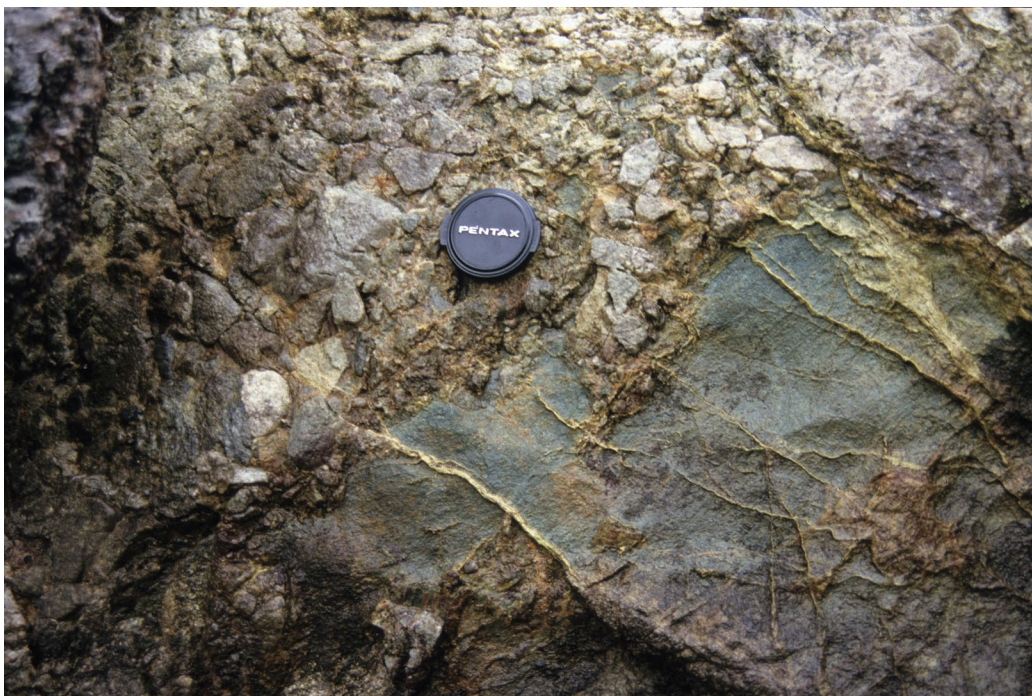

**Figure S5.** The unconformity between greenstones of the Høydalsfjord Complex and Devonian conglomerate (see Fig. S1 for location). Epidote veins extend into the conglomerate.



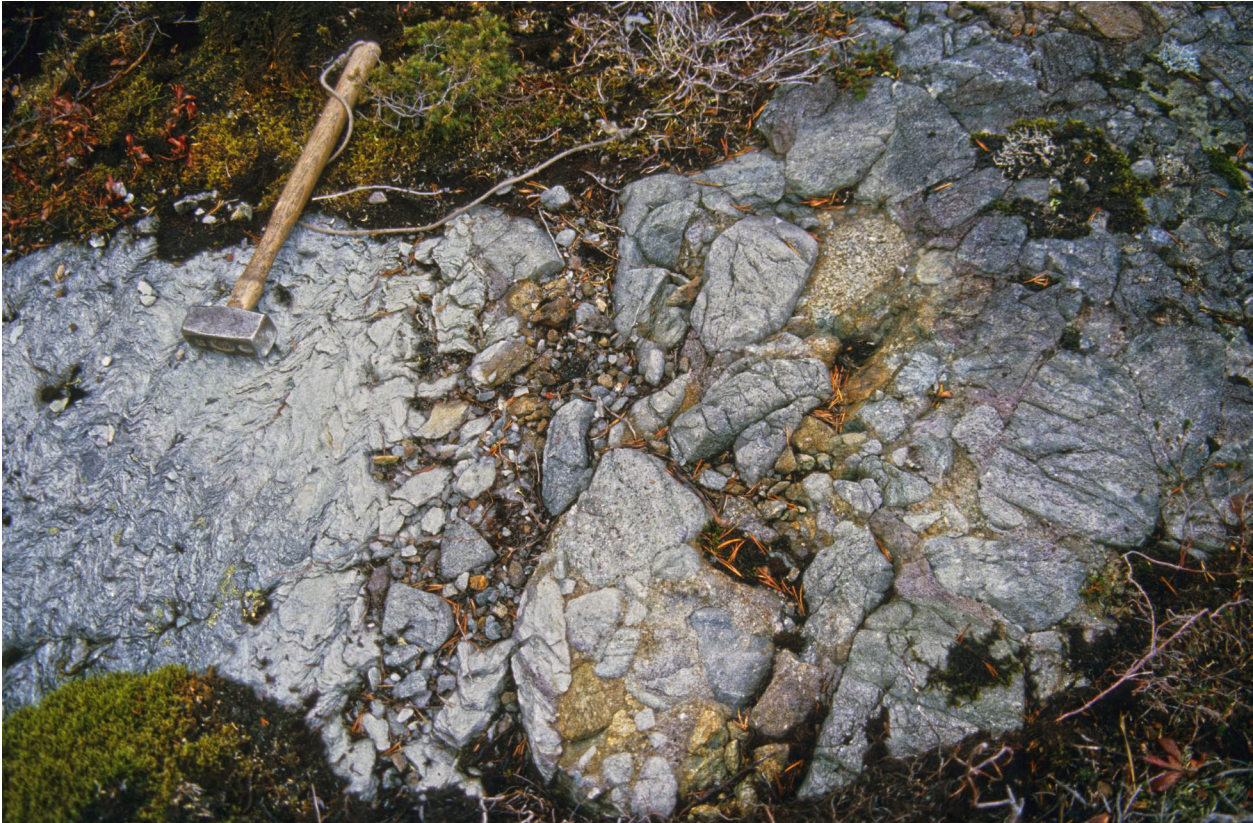

**Figure S6.** Unconformity between crenulated quartz schist (left) and coarse Devonian conglomerate (see Fig. S1 for location). Both the foliation and crenulation predate deposition of the conglomerate.

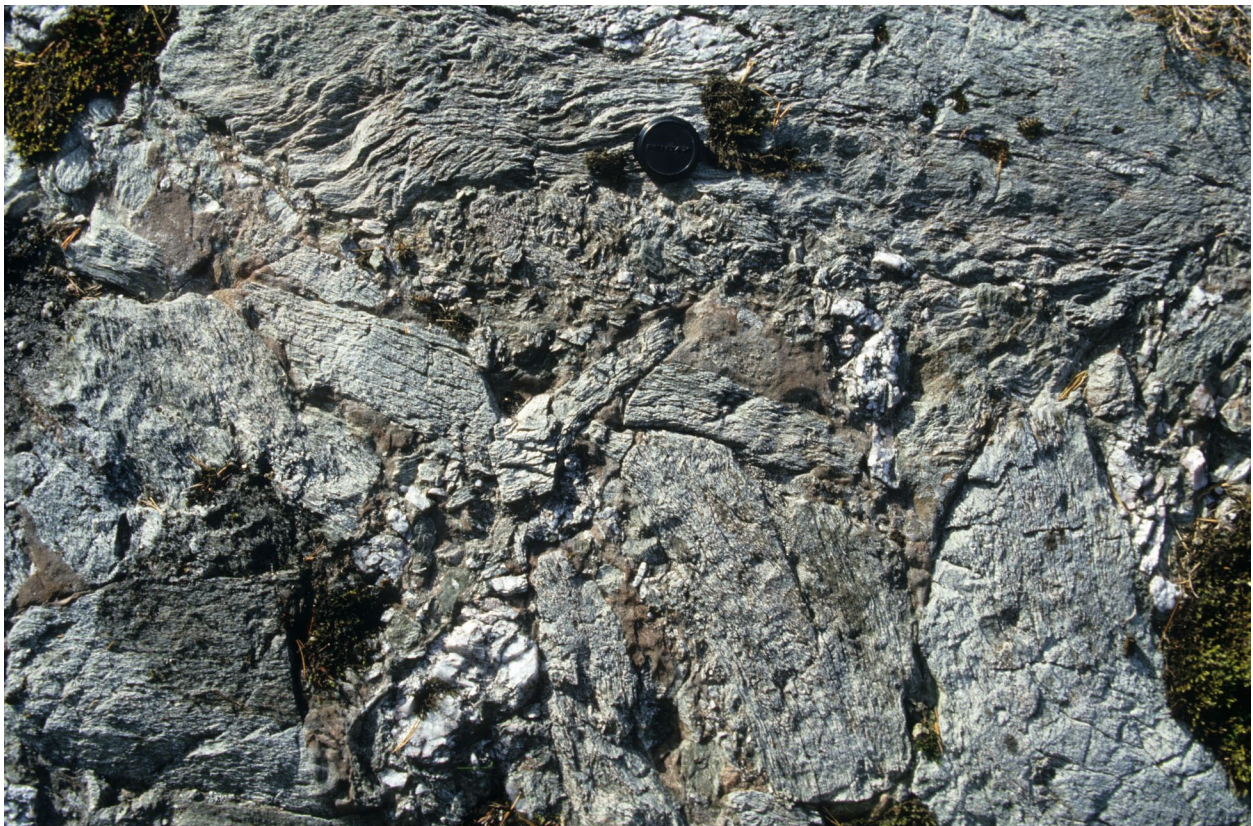

**Figure S7.** Transformation of quartz schist into conglomerate at the northern boundary (unconformity). See Fig. S1 for location.
